# Supplementary material for: Infant functional networks are modulated by state of consciousness and circadian rhythm
Source: PubMed Central journal article supplement (PMC8233111; doi:10.1162/netn_a_00194), 2021-06-21
Supplement: netn-05-614-s001.pdf [file netn-05-614-s001.pdf]

Smith, R. J., Alipourjehdi, E., Garner, C., Maser, A. L., Shrey, D. L. & Lopour, B. A. (2021). Supporting information for "Infant functional networks are modulated by state of consciousness and circadian rhythm". *Network Neuroscience*. Advance publication. [https://doi.org/10.1162/netn\\_a\\_00194](https://doi.org/10.1162/netn_a_00194)

### Supplementary Material

**Supplementary Table 1:** Percentage of epochs removed due to suspected volume conduction

| Subject Number | Percentage of epochs removed for maximum cross-correlation at 0 lag |
|----------------|---------------------------------------------------------------------|
| Subject 1      | 28.11                                                               |
| Subject 2      | 28.84                                                               |
| Subject 3      | 30.26                                                               |
| Subject 4      | 26.8                                                                |
| Subject 5      | 31.44                                                               |
| Subject 6      | 31.15                                                               |
| Subject 7      | 27.53                                                               |
| Subject 8      | 28.39                                                               |
| Subject 9      | 32.41                                                               |
| Subject 10     | 27.92                                                               |
| Subject 11     | 30.04                                                               |
| Subject 12     | 27.73                                                               |
| Subject 13     | 31.77                                                               |
| Subject 14     | 29.9                                                                |
| Subject 15     | 31.02                                                               |
| Subject 16     | 29.56                                                               |
| Subject 17     | 32.09                                                               |
| Subject 18     | 30.05                                                               |
| Subject 19     | 30.07                                                               |

**Supplementary Table 2:** Recording durations and sleep/wake durations per subject

| Subject Number | Total recording duration (seconds) | Duration wakefulness (seconds) | Duration sleep (seconds) |
|----------------|------------------------------------|--------------------------------|--------------------------|
| Subject 1      | 60459                              | 19779                          | 27773                    |
| Subject 2      | 67405                              | 31922                          | 34412                    |
| Subject 3      | 65091                              | 24481                          | 39469                    |
| Subject 4      | 50031                              | 12535                          | 37466                    |
| Subject 5      | 71251                              | 23172                          | 43274                    |
| Subject 6      | 57076                              | 11649                          | 31734                    |
| Subject 7      | 149185                             | 64722                          | 74188                    |
| Subject 8      | 75745                              | 22911                          | 47953                    |
| Subject 9      | 79154                              | 36317                          | 41475                    |
| Subject 10     | 90858                              | 37119                          | 43994                    |
| Subject 11     | 128809                             | 47223                          | 68756                    |
| Subject 12     | 57096                              | 16816                          | 39852                    |
| Subject 13     | 58928                              | 17646                          | 40551                    |
| Subject 14     | 49957                              | 15502                          | 34326                    |
| Subject 15     | 50565                              | 14621                          | 24702                    |
| Subject 16     | 120379                             | 56180                          | 60073                    |
| Subject 17     | 56964                              | 23801                          | 30283                    |
| Subject 18     | 69497                              | 17079                          | 51985                    |
| Subject 19     | 63126                              | 19173                          | 43905                    |

**Supplementary Table 3:** Effect sizes for correlation coefficients between connectivity matrices

| Compared distributions                                            | Cohen's d (effect size) |
|-------------------------------------------------------------------|-------------------------|
| (Across patient, within wake) vs. (Across patient, within sleep)  | 0.874                   |
| (Across patient, within wake) vs. (Across patient, across state)  | 0.233                   |
| (Across patient, within wake) vs. (Within patient, across state)  | 2.227                   |
| (Across patient, within sleep) vs. (Across patient, across state) | 1.244                   |
| (Across patient, within sleep) vs. (Within patient, across state) | 1.637                   |
| (Across patient, across state) vs. (Within patient, across state) | 2.724                   |

**Supplementary Table 4.** Automatic identification of sleep/wake state for 19 subjects

|                   | <b>Scored Wake/<br/>Classified Wake (%)</b> | <b>Scored Sleep/<br/>Classified Sleep (%)</b> | <b>Scored Sleep/<br/>Classified Wake (%)</b> | <b>Scored Wake/<br/>Classified Sleep (%)</b> | <b>Percent Correctly Classified</b> |
|-------------------|---------------------------------------------|-----------------------------------------------|----------------------------------------------|----------------------------------------------|-------------------------------------|
| <b>Subject 1</b>  | 29.38                                       | 54.37                                         | 5.14                                         | 11.09                                        | <b>83.75</b>                        |
| <b>Subject 2</b>  | 45.90                                       | 52.92                                         | 0                                            | 1.16                                         | <b>98.83</b>                        |
| <b>Subject 3</b>  | 32.68                                       | 62.48                                         | 0                                            | 4.82                                         | <b>95.17</b>                        |
| <b>Subject 4</b>  | 24.60                                       | 24.54                                         | 50.84                                        | 0                                            | <b>49.15</b>                        |
| <b>Subject 5</b>  | 28.21                                       | 67.46                                         | 0.29                                         | 4.02                                         | <b>95.67</b>                        |
| <b>Subject 6</b>  | 21.93                                       | 74.98                                         | 0.13                                         | 2.94                                         | <b>96.92</b>                        |
| <b>Subject 7</b>  | 24.44                                       | 56.47                                         | 0.06                                         | 19.02                                        | <b>80.91</b>                        |
| <b>Subject 8</b>  | 31.47                                       | 18.94                                         | 49.58                                        | 0                                            | <b>50.41</b>                        |
| <b>Subject 9</b>  | 38.68                                       | 53.21                                         | 0.79                                         | 7.30                                         | <b>91.89</b>                        |
| <b>Subject 10</b> | 31.96                                       | 55.26                                         | 0                                            | 12.77                                        | <b>87.22</b>                        |
| <b>Subject 11</b> | 34.58                                       | 59.58                                         | 0.02                                         | 5.79                                         | <b>94.17</b>                        |
| <b>Subject 12</b> | 25.86                                       | 32.66                                         | 37.75                                        | 3.71                                         | <b>58.52</b>                        |
| <b>Subject 13</b> | 28.59                                       | 23.57                                         | 46.27                                        | 1.55                                         | <b>52.17</b>                        |
| <b>Subject 14</b> | 30.69                                       | 60.54                                         | 8.15                                         | 0.60                                         | <b>91.23</b>                        |
| <b>Subject 15</b> | 27.92                                       | 63.73                                         | 0                                            | 8.33                                         | <b>91.66</b>                        |
| <b>Subject 16</b> | 43.82                                       | 53.07                                         | 0.20                                         | 2.90                                         | <b>96.89</b>                        |
| <b>Subject 17</b> | 36.57                                       | 56.87                                         | 0.16                                         | 6.38                                         | <b>93.44</b>                        |
| <b>Subject 18</b> | 24.20                                       | 12.75                                         | 62.60                                        | 0.43                                         | <b>36.96</b>                        |
| <b>Subject 19</b> | 22.72                                       | 56.70                                         | 13.46                                        | 7.11                                         | <b>79.42</b>                        |

Subjects in which the percentage of correctly classified epochs exceeded 80% are highlighted in green (n=13

subjects). Subjects in which greater than 15% of the data were incorrectly classified are highlighted in red (n=6

subjects).

Supplementary Figures:

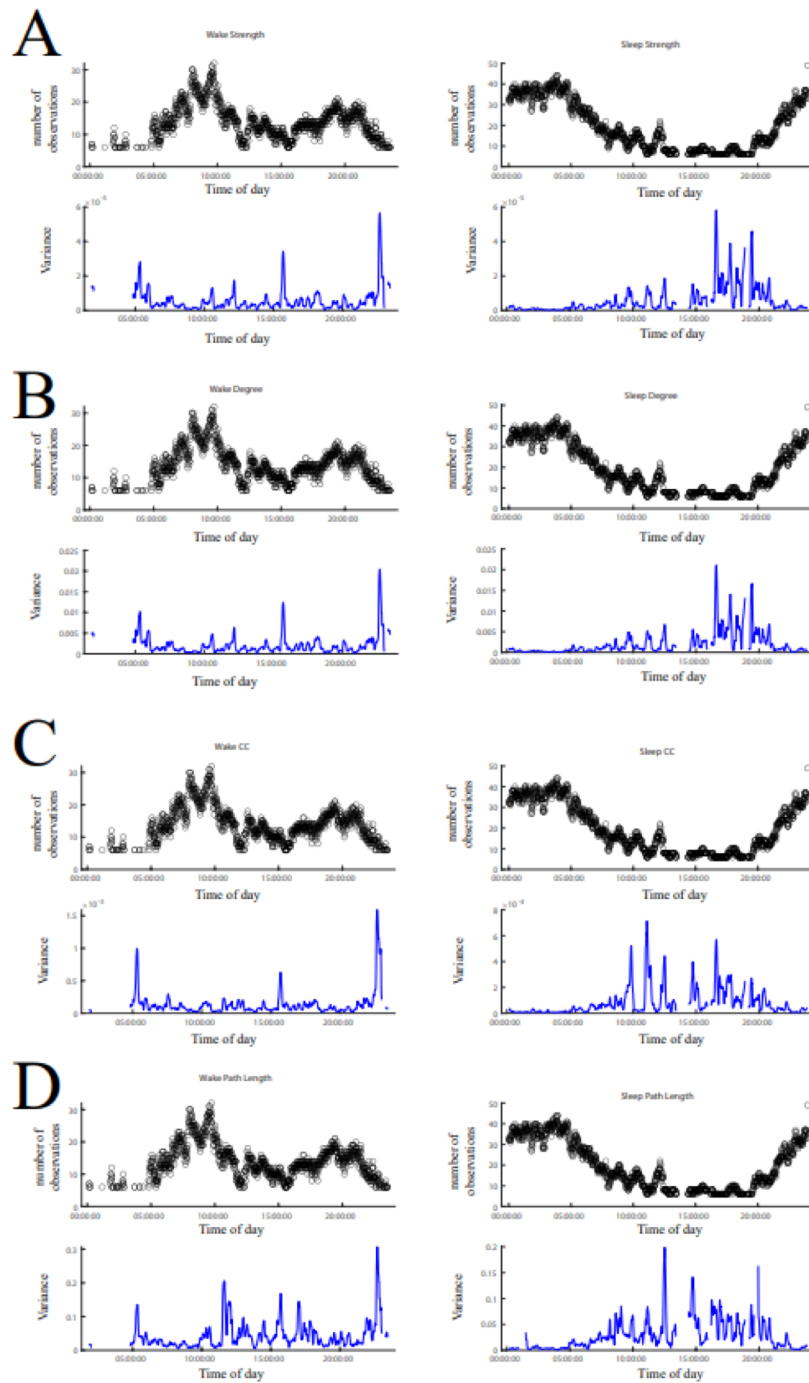

Supplementary Figure 1. The number of observations of strength and topology metrics over ~24-hour periods is related to the variance in the mean values.

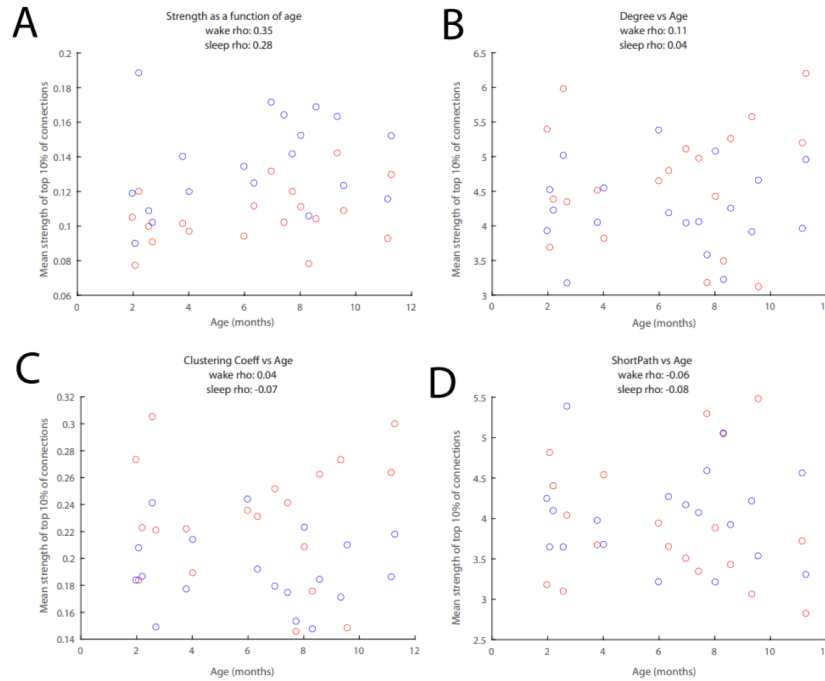

**Supplementary Figure 2.** Mean functional connectivity strength (mean top 10% of connections) and topology metrics as a function of age (months). Network strength during wakefulness was slightly correlated with age ( $\rho = 0.35$ ). Network strength during sleep was even less correlated with age ( $\rho = 0.28$ ). The topology metrics did not significantly vary with age.
